# Supplementary material for: Epigenetic silencing of BCL6B inactivates p53 signaling and causes human hepatocellular carcinoma cell resist to 5-FU
Source: PubMed Central journal article supplement (PMC4484475; doi:10.18632/oncotarget.3413), 2015-03-21
Supplement: oncotarget-06-11547-s001.pdf [file oncotarget-06-11547-s001.pdf]

SUPPLEMENTARY FIGURE AND TABLE

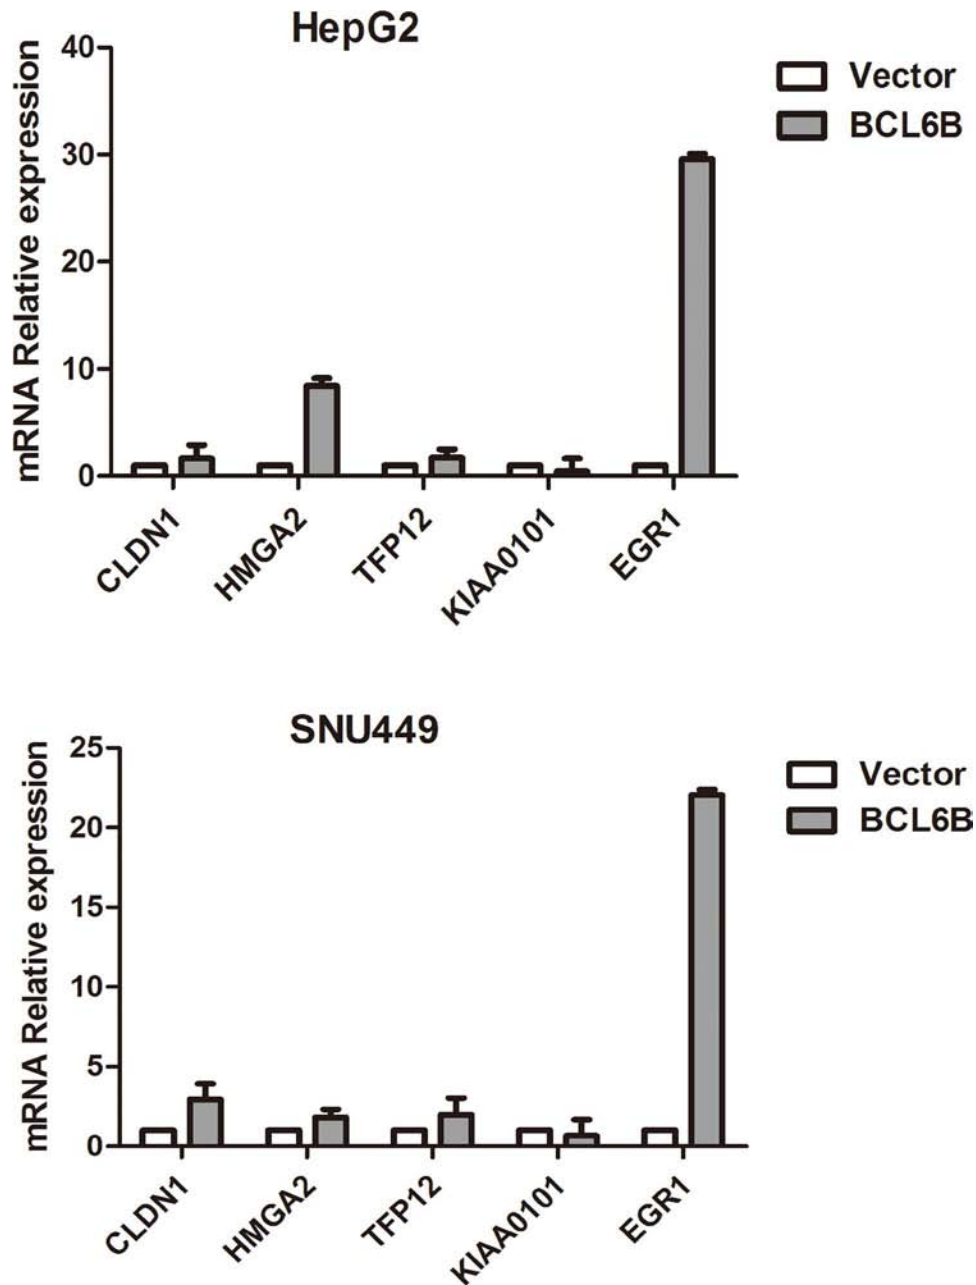

Supplementary Figure S1: The level of HMGA2, CLDN1, TFP12, KIAA0101 and EGR1 expressed in HCC cells detected by quantitative RT-PCR before and after restoration of BCL6B expression.

**Supplementary Table S1. The genes were upregulated and downregulated by BCL6B in HCC cell line**

| Upregulated genes ( <i>n</i> = 167) |            | Downregulated genes ( <i>n</i> = 63) |          |
|-------------------------------------|------------|--------------------------------------|----------|
| Gene_symbol                         | Times      | Gene_symbol                          | Times    |
| EGR1                                | 31.3815045 | ATP5G3                               | 7.111045 |
| DHRS2                               | 16.420902  | ST6GAL1                              | 5.310881 |
| HAS2                                | 9.76672    | RAB26                                | 5.165062 |
| NA                                  | 8.991794   | COQ10A                               | 5.134877 |
| ZACN                                | 8.823521   | CDKN2C                               | 4.554174 |
| AMIGO2                              | 7.298769   | IDH2                                 | 4.487811 |
| TM6SF2                              | 6.695016   | IL17RB                               | 4.412037 |
| ANGPTL4                             | 6.691899   | PAFAH1B                              | 4.260382 |
| FEM1B                               | 6.409032   | HADH                                 | 4.145542 |
| HTR1B                               | 6.211841   | PSMB10                               | 3.997763 |
| IGFBP3                              | 6.112328   | TP53INP2                             | 3.944969 |
| OR14J1                              | 6.052965   | MMAB                                 | 3.888405 |
| FOSL1                               | 6.051892   | CLN8                                 | 3.863185 |
| CTGF                                | 5.987761   | Previous version conserved probe     | 3.858666 |
| ARRDC3                              | 5.68039    | Previous version conserved probe     | 3.810497 |
| AMBP                                | 5.621531   | MAMLD1                               | 3.754039 |
| BACH1                               | 5.570035   | LHPP                                 | 3.734356 |
| ZNF121                              | 5.528381   | NA                                   | 3.692944 |
| IL7R                                | 5.322968   | Previous version conserved probe     | 3.627056 |
| REST                                | 5.290353   | TMEM37                               | 3.61257  |
| TNFRSF10D                           | 5.284688   | Previous version conserved probe     | 3.609654 |
| EID3                                | 5.252144   | SLC25A29                             | 3.601757 |
| FLJ22184                            | 5.244801   | TLR3                                 | 3.569876 |
| IGFBP3                              | 5.173802   | CYBRD1                               | 3.568724 |
| SERPINE2                            | 5.166981   | NAT14                                | 3.521993 |
| RND3                                | 5.098544   | PPP1R3E                              | 3.497577 |
| HMGA2                               | 5.065342   | LDOC1                                | 3.482483 |
| TIPARP                              | 5.009214   | SLC22A18                             | 3.47672  |
| CA9                                 | 4.995435   | NRM                                  | 3.427386 |
| RELB                                | 4.937145   | SH3TC1                               | 3.357971 |

(Continued)

| Upregulated genes (n = 167)      |          | Downregulated genes (n = 63)     |          |
|----------------------------------|----------|----------------------------------|----------|
| Gene_symbol                      | Times    | Gene_symbol                      | Times    |
| RORC                             | 4.834999 | DISP1                            | 3.57857  |
| MT1E                             | 4.823756 | PCK2                             | 3.329287 |
| GNAO1                            | 4.813042 | MTSS1                            | 3.315519 |
| TFPI2                            | 4.811958 | CPZ                              | 3.288069 |
| Previous version conserved probe | 4.79754  | SERPINI1                         | 3.236084 |
| ABCB9                            | 4.795115 | CD83                             | 3.228543 |
| HIST1H2BG                        | 4.763129 | LPIN1                            | 3.22805  |
| KRTAP22-1                        | 4.74737  | KIAA0101                         | 3.221384 |
| ADM                              | 4.734164 | ABCC3                            | 3.214273 |
| GAN                              | 4.725632 | TMEM14A                          | 3.211781 |
| KLF10                            | 4.671177 | LOC728537                        | 3.195926 |
| KRTAP4-5                         | 4.657278 | ZNF428                           | 3.177968 |
| KLHL15                           | 4.637347 | NTF3                             | 3.173225 |
| LAIR2                            | 4.61979  | CD70                             | 3.17265  |
| CYR61                            | 4.615643 | SSR1                             | 3.169561 |
| GADD45A                          | 4.590169 | AKR1B10                          | 3.158617 |
| TMEM211                          | 4.554227 | SLC25A35                         | 3.127822 |
| BACH1                            | 4.531061 | HAGHL                            | 3.118208 |
| ACTA1                            | 4.516804 | FRAT1                            | 3.114968 |
| JUN                              | 4.513631 | ACCS                             | 3.112772 |
| GABPB1                           | 4.497107 | CLN8                             | 3.110792 |
| ZBTB21                           | 4.470331 | LOC100507410                     | 3.099151 |
| NA                               | 4.465924 | Previous version conserved probe | 3.096608 |
| IER3                             | 4.456024 | Previous version conserved probe | 3.096127 |
| SENP5                            | 4.44033  | CTDSPL                           | 3.095438 |
| OR2F2                            | 4.4067   | CNFN                             | 3.067764 |
| RLIM                             | 4.309678 | LGSN                             | 3.064031 |
| UGCG                             | 4.303486 | Previous version conserved probe | 3.06187  |
| HAS3                             | 4.299462 | SMAD6                            | 3.044478 |
| RIT1                             | 4.297867 | VASH1                            | 3.03962  |
| SLC28A3                          | 4.279701 | POLH                             | 2.984255 |

(Continued)

| Upregulated genes ( <i>n</i> = 167) |          | Downregulated genes ( <i>n</i> = 63) |          |
|-------------------------------------|----------|--------------------------------------|----------|
| Gene_symbol                         | Times    | Gene_symbol                          | Times    |
| TNFAIP3                             | 4.256081 | DNMT3L                               | 2.973142 |
| RGS6                                | 4.29006  | Previous version conserved probe     | 2.959754 |
| IL6A                                | 4.189131 |                                      |          |
| SKIL                                | 4.187362 |                                      |          |
| NA                                  | 4.095417 |                                      |          |
| SYVN1                               | 4.048273 |                                      |          |
| Previous version conserved probe    | 4.01005  |                                      |          |
| APOD                                | 4.006074 |                                      |          |
| SOCS4                               | 3.99778  |                                      |          |
| SOCS2                               | 3.975979 |                                      |          |
| TXNIP                               | 3.974856 |                                      |          |
| STC2                                | 3.92182  |                                      |          |
| Previous version conserved probe    | 3.905912 |                                      |          |
| XRN1                                | 3.864944 |                                      |          |
| ARNT2                               | 3.827677 |                                      |          |
| GKN2                                | 3.823828 |                                      |          |
| FOLR3                               | 3.804816 |                                      |          |
| DNAJC27                             | 3.797725 |                                      |          |
| CD14                                | 3.782803 |                                      |          |
| ACSM1                               | 3.779232 |                                      |          |
| TIPARP                              | 3.768639 |                                      |          |
| TFPI2                               | 3.75966  |                                      |          |
| IKZF5                               | 3.737925 |                                      |          |
| VIMP                                | 3.723051 |                                      |          |
| YOD1                                | 3.722015 |                                      |          |
| CCL23                               | 3.713859 |                                      |          |
| ZIC5                                | 3.692965 |                                      |          |
| RCOR3                               | 3.686028 |                                      |          |
| NKX3-2                              | 3.684322 |                                      |          |
| HHAT                                | 3.682812 |                                      |          |
| ARL5B                               | 3.632136 |                                      |          |
| CBR4                                | 3.631683 |                                      |          |

(Continued)

| Upregulated genes (n = 167) |          | Downregulated genes (n = 63) |       |
|-----------------------------|----------|------------------------------|-------|
| Gene_symbol                 | Times    | Gene_symbol                  | Times |
| ZNF91-CNTF                  | 3.624791 |                              |       |
| ZNF579                      | 3.567502 |                              |       |
| PPP1R15A                    | 3.566831 |                              |       |
| KRTAP10-11                  | 3.560625 |                              |       |
| BEFB1                       | 3.526151 |                              |       |
| BTG1                        | 3.515382 |                              |       |
| NA                          | 3.497635 |                              |       |
| DNAJB2                      | 3.477544 |                              |       |
| LIN7C                       | 3.473314 |                              |       |
| ZNF100                      | 3.457458 |                              |       |
| OTUD1                       | 3.445979 |                              |       |
| ADAMTS16                    | 3.424203 |                              |       |
| FAM22F                      | 3.420947 |                              |       |
| ZFP36L2                     | 3.406391 |                              |       |
| RGPD2                       | 3.403125 |                              |       |
| NRAS                        | 3.402121 |                              |       |
| ACE                         | 3.396323 |                              |       |
| USP36                       | 3.396017 |                              |       |
| KLLN                        | 3.382249 |                              |       |
| PLEKHF2                     | 3.376264 |                              |       |
| MT1X                        | 3.375341 |                              |       |
| DNAJB9                      | 3.368374 |                              |       |
| TEMD6                       | 3.349737 |                              |       |
| CLDN1                       | 3.34402  |                              |       |
| KRT34                       | 3.344014 |                              |       |
| ZNF780A                     | 3.338213 |                              |       |
| BIRC3                       | 3.327507 |                              |       |
| DYRK2                       | 3.304364 |                              |       |
| PRND                        | 3.301632 |                              |       |
| TANC2                       | 3.300915 |                              |       |
| ZNF483                      | 3.292883 |                              |       |
| NAT8L                       | 3.284288 |                              |       |
| FGFR1OP2                    | 3.278565 |                              |       |
| C7orf61                     | 3.273194 |                              |       |

(Continued)

| Upregulated genes (n = 167)      |          | Downregulated genes (n = 63) |       |
|----------------------------------|----------|------------------------------|-------|
| Gene_symbol                      | Times    | Gene_symbol                  | Times |
| SSTR4                            | 3.269397 |                              |       |
| NEK7                             | 3.26409  |                              |       |
| CHST11                           | 3.240821 |                              |       |
| CREBRF                           | 3.223459 |                              |       |
| RGS2                             | 3.219536 |                              |       |
| AVIL                             | 3.215913 |                              |       |
| PRTG                             | 3.213472 |                              |       |
| CITED2                           | 3.210328 |                              |       |
| RASAL3                           | 3.200928 |                              |       |
| DUSP5                            | 3.186504 |                              |       |
| Previous version conserved probe | 3.178196 |                              |       |
| ANKRD12                          | 3.174043 |                              |       |
| FGFR1OP2                         | 3.161886 |                              |       |
| SOCS6                            | 3.145414 |                              |       |
| TROVE2                           | 3.1427   |                              |       |
| Previous version conserved probe | 3.133142 |                              |       |
| PLB1                             | 3.119883 |                              |       |
| RMND5A                           | 3.117397 |                              |       |
| STK35                            | 3.08311  |                              |       |
| ABL2                             | 3.08292  |                              |       |
| FAHD2A                           | 3.078636 |                              |       |
| PDK4                             | 3.073212 |                              |       |
| COL8A2                           | 3.073066 |                              |       |
| USP31                            | 3.071179 |                              |       |
| TRIO                             | 3.049309 |                              |       |
| ATF3                             | 3.047638 |                              |       |
| ZFP36L1                          | 3.047542 |                              |       |
| STK4                             | 3.046791 |                              |       |
| EFNB2                            | 3.037967 |                              |       |
| MAP4K5                           | 3.034629 |                              |       |
| SLC30A1                          | 3.034295 |                              |       |
| LAMA4                            | 3.031349 |                              |       |
| NA                               | 3.030964 |                              |       |

(Continued)

| Upregulated genes ( <i>n</i> = 167) |          | Downregulated genes ( <i>n</i> = 63) |       |
|-------------------------------------|----------|--------------------------------------|-------|
| Gene_symbol                         | Times    | Gene_symbol                          | Times |
| YOD1                                | 3.013577 |                                      |       |
| Previous version conserved probe    | 3.007218 |                                      |       |
| NCSTN                               | 3.003911 |                                      |       |
| AGR3                                | 2.993321 |                                      |       |
| Previous version conserved probe    | 2.989411 |                                      |       |
| Previous version conserved probe    | 2.987623 |                                      |       |
